# Supplementary material for: Systematic Analysis of the Clinical Relevance of Cell Division Cycle Associated Family in Endometrial Carcinoma
Source: PubMed Central journal article supplement (PMC7477460; doi:10.7150/jca.46324), 2020-07-20
Supplement: jcav11p5588s1.pdf [file jcav11p5588s1.pdf]

**A** NUF2 expression in UCEC normal & tumor group  
 $t(35.132) = -28.782, p < 0.001, g = 6.141, 95\% \text{ CI } [5.590, 6.692], n = 566$ 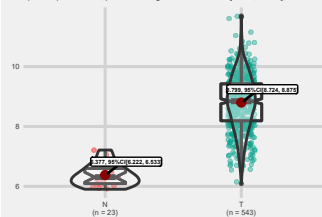**B** CDCA2 expression in UCEC normal & tumor group  
 $t(34.781) = -29.386, p < 0.001, g = 6.269, 95\% \text{ CI } [5.713, 6.825], n = 566$ 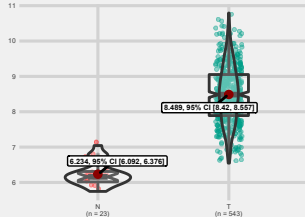**C** CDCA3 expression in UCEC normal & tumor group  
 $t(33.658) = -32.389, p < 0.001, g = 6.908, 95\% \text{ CI } [6.327, 7.489], n = 566$ 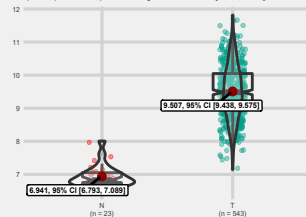**D** CDCA4 expression in UCEC normal & tumor group  
 $t(42.654) = -24.767, p < 0.001, g = 5.292, 95\% \text{ CI } [4.773, 5.812], n = 566$ 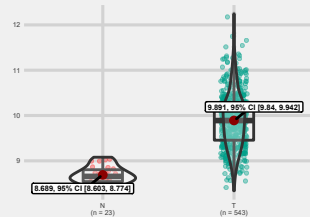**E** CDCA5 expression in UCEC normal & tumor group  
 $t(35.391) = -31.766, p < 0.001, g = 6.778, 95\% \text{ CI } [6.202, 7.354], n = 566$ 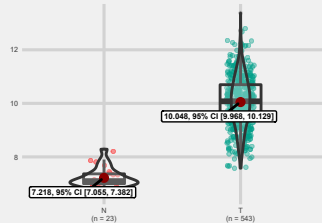**F** CBX2 expression in UCEC normal & tumor group  
 $t(34.789) = -19.061, p < 0.001, g = 4.066, 95\% \text{ CI } [3.586, 4.547], n = 566$ 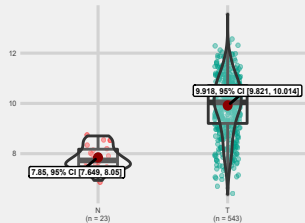**G** CDCA7 expression in UCEC normal & tumor group  
 $t(24.229) = -9.872, p < 0.001, g = 2.099, 95\% \text{ CI } [1.663, 2.535], n = 566$ 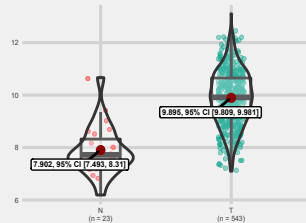**H** CDCA8 expression in UCEC normal & tumor group  
 $t(33.097) = -33.020, p < 0.001, g = 7.041, 95\% \text{ CI } [6.455, 7.628], n = 566$ 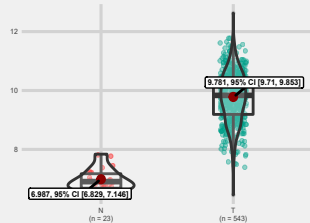

---

**Table S1. clinical parameters of patients with endometrial carcinoma in TCGA cohort**

---

| <b>Clinical parameters</b> |          | <b>Total</b>     | <b>%</b> |
|----------------------------|----------|------------------|----------|
| <b>Age at diagnosis</b>    |          | <b>63(33-90)</b> |          |
| FIGO cancer staging system | I        | 339              | 62.43%   |
|                            | II       | 51               | 9.39%    |
|                            | III      | 124              | 22.83%   |
|                            | IV       | 29               | 5.34%    |
| Histological grade         | well     | 98               | 18.05%   |
|                            | moderate | 120              | 22.09%   |
|                            | poor     | 325              | 59.86%   |
| Histologic subtype         | EEA      | 407              | 74.95%   |
|                            | MSE      | 22               | 4.05%    |
|                            | SEA      | 114              | 21.00%   |

---

FIGO: International Federation of Gynecology & Obstetrics; EEA: endometrioid endometrial adenocarcinoma; MSE: mix serous and endometrioid carcinoma; SEA: serous endometrial adenocarcinoma

---

Table S2

| Function                                            | FDR      | Genes in network | Genes in genome |
|-----------------------------------------------------|----------|------------------|-----------------|
| mitosis                                             | 1.32E-13 | 12               | 180             |
| chromosome, centromeric region                      | 7.34E-13 | 10               | 98              |
| nuclear division                                    | 3.18E-12 | 12               | 256             |
| chromosome segregation                              | 5.80E-12 | 10               | 128             |
| organelle fission                                   | 5.87E-12 | 12               | 281             |
| spindle                                             | 1.04E-11 | 10               | 141             |
| microtubule cytoskeleton organization               | 1.42E-11 | 11               | 220             |
| protein-DNA complex                                 | 2.49E-11 | 10               | 158             |
| kinetochore                                         | 1.79E-10 | 8                | 74              |
| condensed chromosome kinetochore                    | 6.93E-10 | 6                | 22              |
| regulation of cell division                         | 9.28E-10 | 9                | 153             |
| condensed chromosome, centromeric                   | 1.78E-09 | 6                | 26              |
| spindle microtubule                                 | 2.50E-08 | 6                | 40              |
| midbody                                             | 2.50E-08 | 7                | 81              |
| condensed chromosome                                | 3.53E-08 | 7                | 86              |
| regulation of mitosis                               | 6.74E-08 | 7                | 95              |
| regulation of nuclear division                      | 9.82E-08 | 7                | 101             |
| spindle organization                                | 6.46E-07 | 6                | 70              |
| condensed chromosome outer kinetochore              | 1.13E-06 | 4                | 11              |
| G2/M transition of mitotic cell cycle               | 1.42E-06 | 7                | 152             |
| cell cycle G2/M phase transition                    | 1.42E-06 | 7                | 152             |
| establishment of chromosome localization            | 1.61E-05 | 4                | 21              |
| spindle pole                                        | 1.61E-05 | 5                | 59              |
| chromosome localization                             | 1.61E-05 | 4                | 21              |
| microtubule                                         | 4.51E-05 | 6                | 149             |
| regulation of mitotic cell cycle                    | 9.94E-05 | 7                | 290             |
| mitotic spindle organization                        | 0.000123 | 4                | 35              |
| cell cycle phase                                    | 0.000228 | 4                | 41              |
| spindle checkpoint                                  | 0.000295 | 4                | 44              |
| cytokinesis                                         | 0.000323 | 5                | 112             |
| mitotic sister chromatid segregation                | 0.000428 | 4                | 49              |
| sister chromatid segregation                        | 0.000616 | 4                | 54              |
| establishment of organelle localization             | 0.00077  | 5                | 136             |
| attachment of spindle microtubules to kinetochore   | 0.001439 | 3                | 19              |
| organelle localization                              | 0.001598 | 5                | 160             |
| M phase                                             | 0.001598 | 3                | 20              |
| positive regulation of cell cycle process           | 0.002507 | 5                | 177             |
| microtubule binding                                 | 0.00253  | 4                | 80              |
| protein localization to chromosome                  | 0.002608 | 3                | 24              |
| positive regulation of cell cycle                   | 0.003208 | 4                | 86              |
| positive regulation of mitosis                      | 0.004831 | 3                | 30              |
| microtubule anchoring                               | 0.004831 | 3                | 30              |
| positive regulation of nuclear division             | 0.006323 | 3                | 33              |
| organelle assembly                                  | 0.006904 | 5                | 226             |
| spindle assembly                                    | 0.007234 | 3                | 35              |
| spindle assembly checkpoint                         | 0.008385 | 3                | 37              |
| metaphase/anaphase transition of mitotic cell cycle | 0.010405 | 3                | 40              |
| metaphase/anaphase transition of cell               | 0.010982 | 3                | 41              |
| microtubule polymerization or depolymerization      | 0.011343 | 3                | 42              |
| tubulin binding                                     | 0.011343 | 4                | 125             |
| regulation of mitotic metaphase/anaphase transition | 0.013706 | 3                | 45              |

|                                            |          |   |     |
|--------------------------------------------|----------|---|-----|
| regulation of metaphase/anaphase           |          |   |     |
| transition of cell cycle                   | 0.014367 | 3 | 46  |
| protein kinase binding                     | 0.014943 | 5 | 276 |
| centrosome organization                    | 0.033945 | 3 | 62  |
| regulation of microtubule cytoskeleton     |          |   |     |
| organization                               | 0.039453 | 3 | 66  |
| microtubule organizing center organization | 0.039453 | 3 | 66  |
| spindle assembly involved in mitosis       | 0.052329 | 2 | 13  |
| regulation of microtubule-based process    | 0.070012 | 3 | 81  |
| cell cycle checkpoint                      | 0.070114 | 4 | 209 |
| maintenance of protein location in cell    | 0.073818 | 3 | 84  |
| regulation of centrosome cycle             | 0.073818 | 2 | 16  |
| metaphase plate congression                | 0.073818 | 2 | 16  |
| maintenance of location in cell            | 0.090903 | 3 | 91  |
| mitotic cytokinesis                        | 0.090989 | 2 | 18  |
| maintenance of protein location            | 0.090989 | 3 | 92  |
